# Supplementary material for: Vertical 3D Printed Pd/TiO2 Arrays for High Efficiency Photo-assisted Catalytic Water Treatment
Source: Springer Nature journal article supplement (doi:10.1007/s40242-023-3182-2), 2023-09-19
Supplement: 40242_2023_3182_MOESM1_ESM.pdf [file 40242_2023_3182_MOESM1_ESM.pdf]

# Supporting Information

## Vertical 3D Printed Pd/TiO<sub>2</sub> Arrays for High Efficiency Photo-assisted Catalytic Water Treatment

Chenhao Fu<sup>a,∇</sup>, Dan Li<sup>a,∇</sup>, Jianwei Zhang<sup>a,∇</sup>, Wei Guo<sup>a</sup>, He Yang<sup>a</sup>, Bo Zhao<sup>a</sup>, Zhaomin Chen<sup>a</sup>,  
Xin Fu<sup>b</sup>, Zhiqiang Liang<sup>a,\*</sup>, Lin Jiang<sup>a,\*</sup>

- a. Institute of Functional Nano and Soft Materials Laboratory (FUNSOM) and Jiangsu Key Laboratory for Carbon-Based Functional Materials and Devices, Soochow University, Suzhou 215123, Jiangsu, P. R. China.
- b. Shanghai Institute of Satellite Engineering, 3666 Yuanjiang Road, Minhang District 200240, Shanghai, P. R. China.

\*Email: [zqliang@suda.edu.cn](mailto:zqliang@suda.edu.cn); [ljiang@suda.edu.cn](mailto:ljiang@suda.edu.cn)

**Keywords:** 3D printing, TiO<sub>2</sub>, Hierarchical vertical array, Catalytic water treatment, 4-nitrophenol

**Supplementary Figures:**

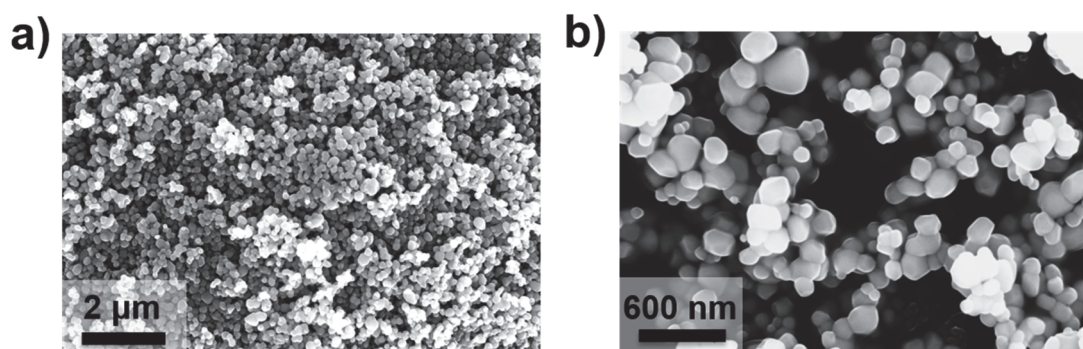

**Figure S1.** SEM images of raw TiO<sub>2</sub> particles with submicron diameters.

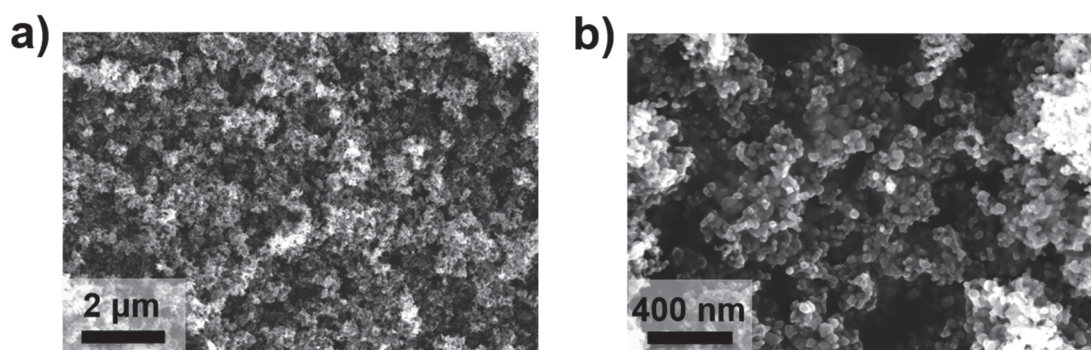

**Figure S2.** SEM images of raw TiO<sub>2</sub> nanoparticles.

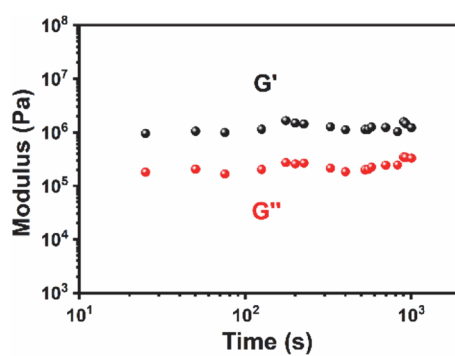

**Figure S3.** Dynamic modulus ( $G'$  and  $G''$ ) evolution as a function of time for the TiO<sub>2</sub> ink with a solid content of 56 wt%.

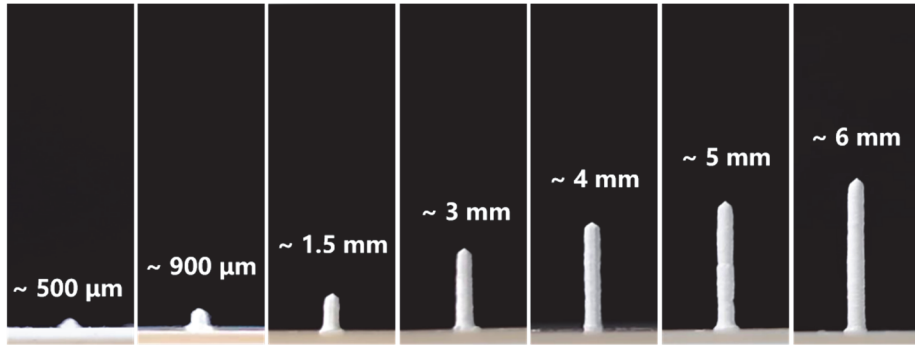

**Figure S4.** Optical images of TiO<sub>2</sub> vertical pillars with different heights, demonstrating the flexibility and controllability of vertical 3D printing.

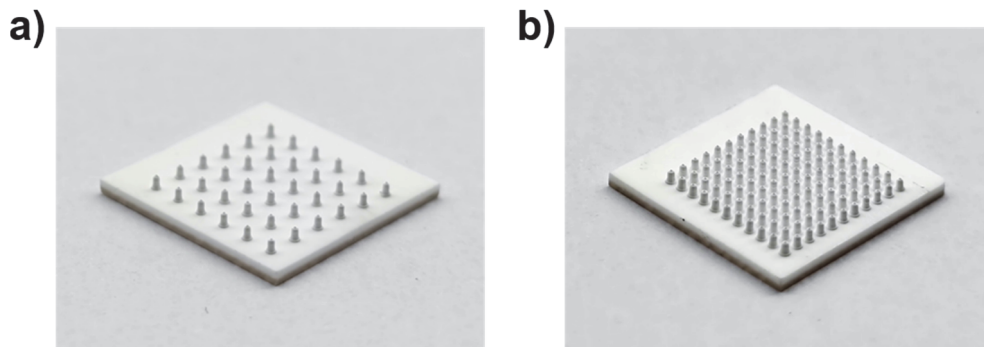

**Figure S5.** Optical images of TiO<sub>2</sub> pillar arrays with different packing densities.

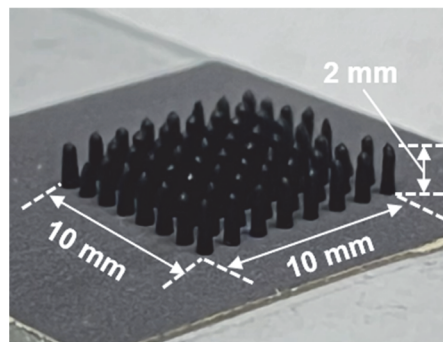

**Figure S6.** Photograph of a vertically printed graphene array.

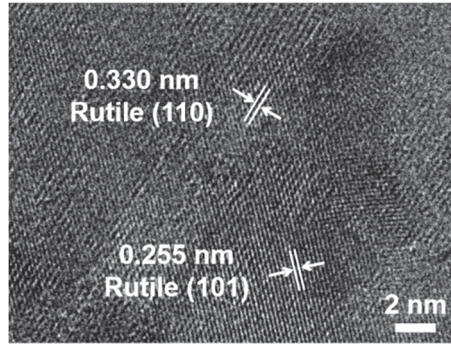

**Figure S7.** The lattice fringe spacing of a TiO<sub>2</sub> nanorod.

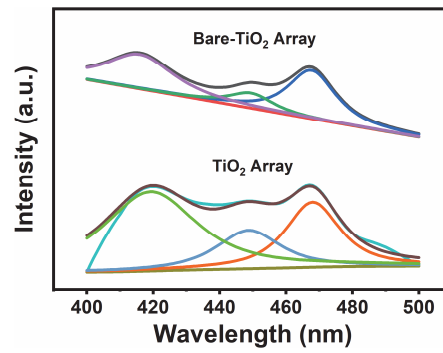

**Figure S8.** Photoluminescence spectra of the bare-TiO<sub>2</sub> array and hierarchical TiO<sub>2</sub> array.

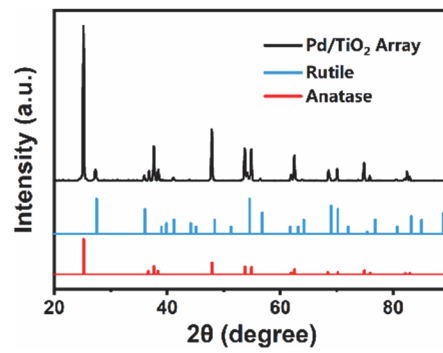

**Figure S9.** XRD patterns of Pd/TiO<sub>2</sub> array in contrast to rutile TiO<sub>2</sub> and anatase TiO<sub>2</sub>.

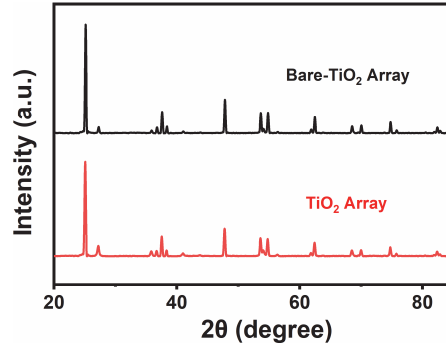

**Figure S10.** XRD patterns of vertically printed TiO<sub>2</sub> pillar array without (top) and with (bottom) nanorods.

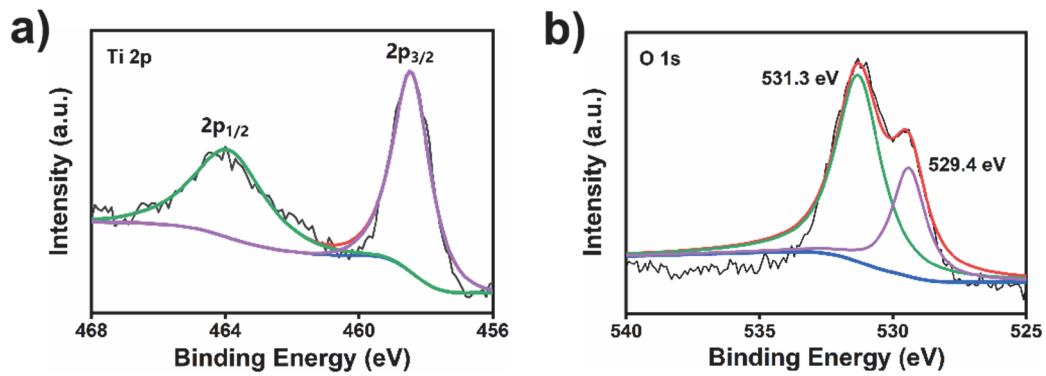

**Figure S11.** XPS survey spectra of Ti 2p peaks and O 1s peaks.

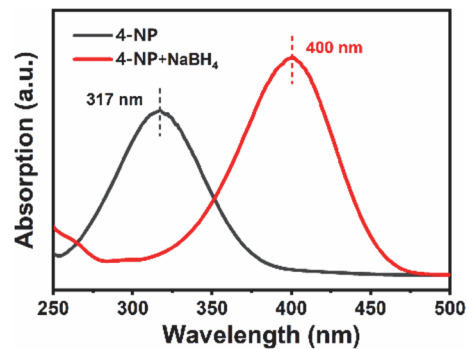

**Figure S12.** UV-vis spectra of pure 4-NP aqueous solution as well as the mixed solution of 4-NP and NaBH<sub>4</sub>. The addition of NaBH<sub>4</sub> enabled the absorption peak to redshift from 317 nm to 400 nm.

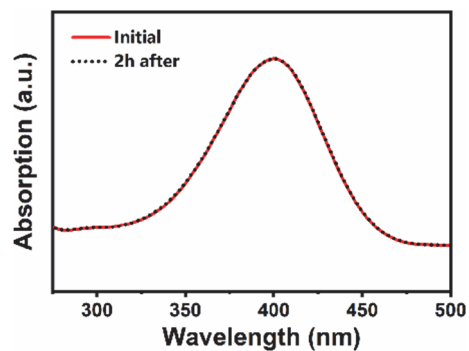

**Figure S13.** UV-vis spectra of the mixed solution of 4-NP and NaBH<sub>4</sub> in the absence of catalysts, initially and being placed in dark conditions for 2 hours.

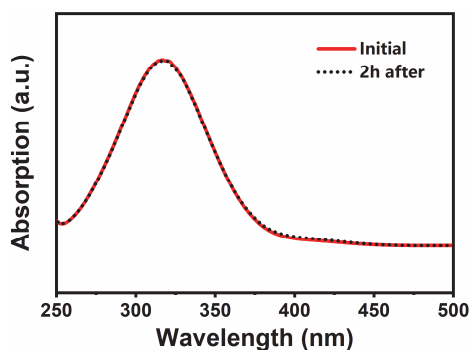

**Figure S14.** UV-vis spectra of the 4-NP solution with catalysts in the absence of NaBH<sub>4</sub>, initially and being placed in dark conditions for 2 hours.

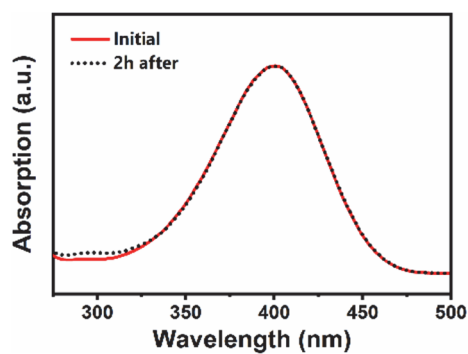

**Figure S15.** Under light irradiation, comparison of UV-vis spectra of the mixed solution of 4-NP and NaBH<sub>4</sub> at the initial time and after 2 hours in the absence of catalysts.

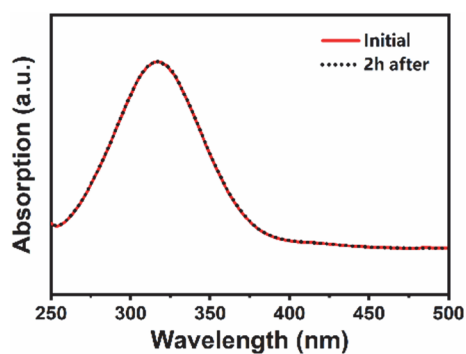

**Figure S16.** Under light irradiation, comparison of UV-vis spectra of the 4-NP solution with catalysts at the initial time and after 2 hours in the absence of NaBH<sub>4</sub>.

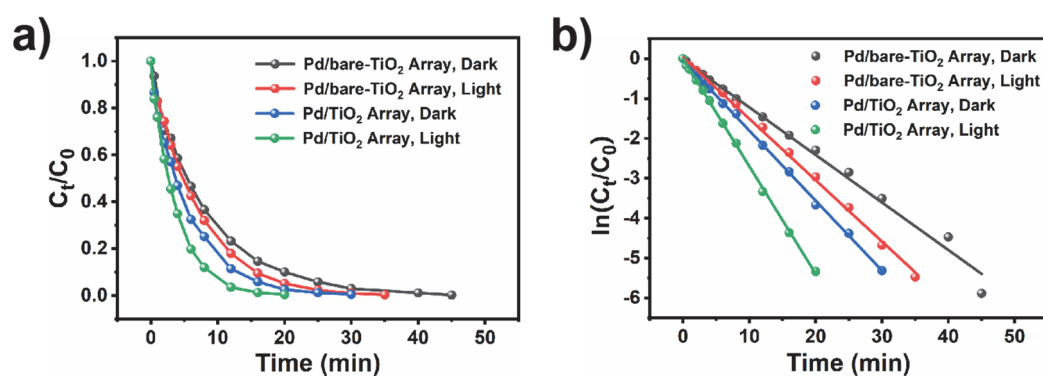

**Figure S17.** (a) Plots of  $C_t/C_0$  vs the reaction time for the catalytic reduction of 4-NP to 4-AP using the Pd/bare-TiO<sub>2</sub> array and hierarchical Pd/TiO<sub>2</sub> array under light and dark conditions. b) Plots of  $\ln[C_t/C_0]$  vs the reduction time.

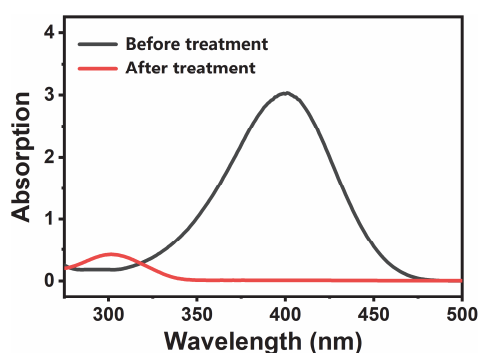

**Figure S18.** Comparison of UV-vis absorption spectra of reaction solutions before and after treatment.

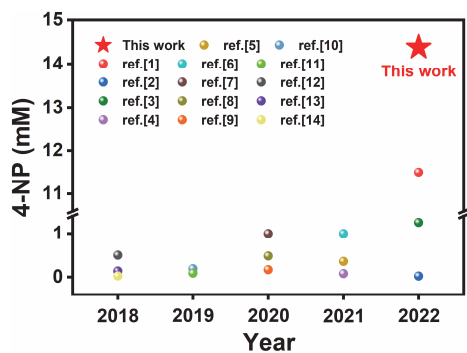

**Figure S19.** Comparison of the 4-NP concentration treated in this work with other works reported in recent years (non-exhaustive survey).<sup>1-14</sup>

### Supplementary videos:

**Video S1.** Dynamic display of the flow state when fluid passes through the TiO<sub>2</sub> vertical array (MP4).

**Video S2.** Dynamic display of the experimental device for the rapid and efficient treatment of 4-NP wastewater by hierarchical Pd/TiO<sub>2</sub> vertical arrays (Double speed video) (MP4).



## Supplementary tables:

**Table S1.** G-code of the vertical 3D printing protocol.

|    |                     |      |      |      |       |
|----|---------------------|------|------|------|-------|
| 1  | Line Speed          | 1.2  |      |      |       |
| 2  | Z Clearance Setup   | 20   | 1    |      |       |
| 3  | Call Subroutine     | 70   | 8    | 95   | 10001 |
| 4  | Call Subroutine     | 70   | 8.5  | 95   | 10001 |
| 5  | Call Subroutine     | 70   | 9    | 95   | 10001 |
| 6  | Call Subroutine     | 70   | 9.5  | 95   | 10001 |
| 7  | Call Subroutine     | 70   | 10   | 95   | 10001 |
| 8  | Call Subroutine     | 70   | 10.5 | 95   | 10001 |
| 9  | Call Subroutine     | 70   | 11   | 95   | 10001 |
| 10 | Call Subroutine     | 70   | 11.5 | 95   | 10001 |
| 11 | Call Subroutine     | 70   | 12   | 95   | 10001 |
| 12 | Call Subroutine     | 70   | 12.5 | 95   | 10001 |
| 13 | Call Subroutine     | 70   | 13   | 95   | 10001 |
| 14 | Call Subroutine     | 70   | 13.5 | 95   | 10001 |
| 15 | Call Subroutine     | 70   | 14   | 95   | 10001 |
| 16 | Call Subroutine     | 70   | 14.5 | 95   | 10001 |
| 17 | Call Subroutine     | 70   | 15   | 95   | 10001 |
| 18 | Call Subroutine     | 70   | 15.5 | 95   | 10001 |
| 19 | Call Subroutine     | 70   | 16   | 95   | 10001 |
| 20 | Call Subroutine     | 70   | 16.5 | 95   | 10001 |
| 21 | Call Subroutine     | 70   | 17   | 95   | 10001 |
| 22 | Call Subroutine     | 70   | 17.5 | 95   | 10001 |
| 23 | Call Subroutine     | 70   | 18   | 95   | 10001 |
| 24 | End Program         |      |      |      |       |
| 25 | Label No            | 1    |      |      |       |
| 26 | Line dispense Setup | 0.2  | 0.5  | 0    | 0     |
| 27 | Line Start          | 70   | 8    | 85   |       |
| 28 | Line End            | 70   | 8    | 84.2 |       |
| 29 | Line Start          | 70.5 | 8    | 85   |       |
| 30 | Line End            | 70.5 | 8    | 84.2 |       |
| 31 | Line Start          | 71   | 8    | 85   |       |
| 32 | Line End            | 71   | 8    | 84.2 |       |
| 33 | Line Start          | 71.5 | 8    | 85   |       |

|    |             |      |   |      |  |
|----|-------------|------|---|------|--|
| 34 | Line End    | 71.5 | 8 | 84.2 |  |
| 35 | Line Start  | 72   | 8 | 85   |  |
| 36 | Line End    | 72   | 8 | 84.2 |  |
| 37 | Line Start  | 72.5 | 8 | 85   |  |
| 38 | Line End    | 72.5 | 8 | 84.2 |  |
| 39 | Line Start  | 73   | 8 | 85   |  |
| 40 | Line End    | 73   | 8 | 84.2 |  |
| 41 | Line Start  | 73.5 | 8 | 85   |  |
| 42 | Line End    | 73.5 | 8 | 84.2 |  |
| 43 | Line Start  | 74   | 8 | 85   |  |
| 44 | Line End    | 74   | 8 | 84.2 |  |
| 45 | Line Start  | 74.5 | 8 | 85   |  |
| 46 | Line End    | 74.5 | 8 | 84.2 |  |
| 47 | Line Start  | 75   | 8 | 85   |  |
| 48 | Line End    | 75   | 8 | 84.2 |  |
| 49 | Line Start  | 75.5 | 8 | 85   |  |
| 50 | Line End    | 75.5 | 8 | 84.2 |  |
| 51 | Line Start  | 76   | 8 | 85   |  |
| 52 | Line End    | 76   | 8 | 84.2 |  |
| 53 | Line Start  | 76.5 | 8 | 85   |  |
| 54 | Line End    | 76.5 | 8 | 84.2 |  |
| 55 | Line Start  | 77   | 8 | 85   |  |
| 56 | Line End    | 77   | 8 | 84.2 |  |
| 57 | Line Start  | 77.5 | 8 | 85   |  |
| 58 | Line End    | 77.5 | 8 | 84.2 |  |
| 59 | Line Start  | 78   | 8 | 85   |  |
| 60 | Line End    | 78   | 8 | 84.2 |  |
| 61 | Line Start  | 78.5 | 8 | 85   |  |
| 62 | Line End    | 78.5 | 8 | 84.2 |  |
| 63 | Line Start  | 79   | 8 | 85   |  |
| 64 | Line End    | 79   | 8 | 84.2 |  |
| 65 | Line Start  | 79.5 | 8 | 85   |  |
| 66 | Line End    | 79.5 | 8 | 84.2 |  |
| 67 | Line Start  | 80   | 8 | 85   |  |
| 68 | Line End    | 80   | 8 | 84.2 |  |
| 69 | End Program |      |   |      |  |

**Table S2.** The comparison of TOF value of 4-NP catalytic reduction by Pd/TiO<sub>2</sub> array with that of Pd-based catalysts reported in literature in the past five years (non-exhaustive survey).

| Sample              | 4-NP (mM) | TOF (min <sup>-1</sup> ) | Reference |
|---------------------|-----------|--------------------------|-----------|
| Pd/3D-AC            | 14.38     | 1.68                     | 15        |
| Pd-D-SCG            | 0.12      | 1.53                     | 16        |
| CS-CNTs-PdNPs       | 0.067     | 0.035                    | 17        |
| Pd/LDHs             | 1.30      | 3.42                     | 18        |
| PNIPAM-Pd           | 0.147     | 6.7                      | 19        |
| MNPs-PDDA-HA/Pd     | 0.1       | 2.18                     | 20        |
| Pd@PPM2             | 0.1       | 0.99                     | 21        |
| Pd/TiO <sub>2</sub> | 14.38     | 2.69                     | 22        |
| Pd@CHI              | 0.013     | 0.42                     | 23        |
| Pd/PNGO             | 0.19      | 6.115                    | 24        |
| Pd@polyCD           | 0.0056    | 0.0316                   | 25        |
| Pd/CNSs             | 0.09      | 2.63                     | 26        |
| Pd/TiO <sub>2</sub> | 14.38     | 8.00/12.17               | This work |

## REFERENCES

- [1] Yuan, S.-F., Guan, Z.-J., Wang, Q.-M., *J. Am. Chem. Soc.*, **2022**, *144* (25), 11405-11412.
- [2] Chen, C.-S., Chen, T.-C., Chiu, K.-L., Wu, H.-C., Pao, C.-W., Chen, C.-L., Hsu, H.-C., Kao, H.-M., *Appl. Catal. B Environ.*, **2022**, *315*, 121596.
- [3] Liu, L., Duan, Y., Liang, Y., Kan, A., Wang, L., Luo, Q., Zhang, Y., Zhang, B., Li, Z., Liu, J., Wang, D., *Small*, **2022**, *18* (8), 2104142.
- [4] Liu, X., Wu, L., Liu, T., Zhang, L., *Appl. Catal. B Environ.*, **2021**, *281*, 119513.
- [5] Gao, C., Xiao, L., Zhou, J., Wang, H., Zhai, S., An, Q., *Chem. Eng. J.*, **2021**, *403*, 126370.
- [6] Zhang, X.-Q., Shen, R.-F., Guo, X.-J., Yan, X., Chen, Y., Hu, J.-T., Lang, W.-z., *Chem. Eng. J.*, **2021**, *408*, 128018.
- [7] Xu, Y., Shi, X., Hua, R., Zhang, R., Yao, Y., Zhao, B., Liu, T., Zheng, J., Lu, G., *Appl. Catal. B Environ.*, **2020**, *260*, 118142.
- [8] Bogireddy, N. K. R., Sahare, P., Pal, U., Méndez, S. F. O., Gomez, L. M., Agarwal, V., *Chem. Eng. J.*, **2020**, *388*, 124237.
- [9] Jiang, D. B., Liu, X., Yuan, Y., Feng, L., Ji, J., Wang, J., Losic, D., Yao, H.-C., Zhang, Y. X., *Chem. Eng. J.*, **2020**, *383*, 123156.
- [10] Chen, S., Fu, H., Zhang, L., Wan, Y., *Appl. Catal. B Environ.*, **2019**, *248*, 22-30.
- [11] Chu, C., Rao, S., Ma, Z., Han, H., *Appl. Catal. B Environ.*, **2019**, *256*, 117792.
- [12] Wang, J., Wu, Z., Li, T., Ye, J., Shen, L., She, Z., Liu, F., *Chem. Eng. J.*, **2018**, *334*, 579-586.
- [13] Nabil, B., Ahmida, E. A., Christine, C., Julien, V., Abdelkrim, A., *Chem. Eng. J.*, **2018**, *351*, 328-339.

- [14] Han, W., Chen, L., Song, W., Wang, S., Fan, X., Li, Y., Zhang, F., Zhang, G., Peng, W., *Appl. Catal. B Environ.*, **2018**, *236*, 212-221.
- [15] Shu, F., Wu, J., Jiang, G., Qiao, Y., Wang, Y., Wu, D., Zhong, Y., Zhang, T., Song, J., Jin, Y., Jiang, B., Xiao, H., *Sep. Purif. Technol.*, **2022**, *300*, 121823.
- [16] Chan, H., Shi, C., Wu, Z., Sun, S., Zhang, S., Yu, Z., He, M., Chen, G., Wan, X., Tian, J., *J. Colloid Interface Sci.*, **2022**, *608*, 1414-1421.
- [17] Zhu, J., Zhang, X., Qin, Z., Zhang, L., Ye, Y., Cao, M., Gao, L., Jiao, T., *Colloids Surf. A Physicochem. Eng. Asp.*, **2021**, *611*, 125889.
- [18] Liu, T., Bai, X., *Environ. Sci. Pollut. Res.*, **2021**, *28* (23), 30090-30100.
- [19] Du, J.-T., Qiao, M., Pu, Y., Wang, J.-X., Chen, J.-F., *Appl. Catal. A Gen.*, **2021**, *624*, 118323.
- [20] Yin, D., Zhang, J., Li, W., Fu, Y., *Catal. Lett.*, **2021**, *151* (7), 1902-1910.
- [21] Bashir, M. S., Jiang, X., Kong, X. Z., *Eur. Polym. J.*, **2020**, *129*, 109652.
- [22] Liu, T., Sun, Y., Jiang, B., Guo, W., Qin, W., Xie, Y., Zhao, B., Zhao, L., Liang, Z., Jiang, L., *ACS Appl. Mater. Interfaces*, **2020**, *12* (25), 28100-28109.
- [23] Li, X., Dong, F., Zhang, L., Xu, Q., Zhu, X., Liang, S., Hu, L., Xie, H., *Chem. Eng. J.*, **2019**, *372*, 516-525.
- [24] Liu, T., Cui, Z., Liu, Y., Bai, X., *Appl. Catal. A Gen.*, **2019**, *588*, 117278.
- [25] Tsuji, T., Hata, K., Futaba, D. N., Sakurai, S., *Nanoscale Adv.*, **2019**, *1* (10), 4076-4081.
- [26] Zhao, Z., Ma, X., Wang, X., Ma, Y., Liu, C., Hang, H., Zhang, Y., Du, Y., Ye, W., *Appl. Surf. Sci.*, **2018**, *457*, 1009-1017.
